# Supplementary material for: Menstrual hygiene management among Bangladeshi adolescent schoolgirls and risk factors affecting school absence: results from a cross-sectional survey
Source: PubMed Central journal article supplement — BMJ Open. 2017 Jul 9;7(7):e015508. doi: 10.1136/bmjopen-2016-015508 (PMC5541609; doi:10.1136/bmjopen-2016-015508), 2017-07-09
Supplement: bmjopen-2016-015508supp001.pdf [file bmjopen-2016-015508supp001.pdf]

**Appendix-C3: School component study: MHM survey  
National Hygiene Survey 2012**

1.1 Questionnaire identification number .....

1.2 Study Area.....

Rural.....0  
Urban .....1

1.3 Cluster number.....

1.3a FRA name & ID.....

1.3b. Date of interview.....   /   /

**Part 1:**  
**Section 1: Adolescent menstrual hygiene**

Note: Respondent for this portion is adolescent girl (we will sample four adolescent girls from one school if available where class 2 to 5 for primary and class 6 to 9 for junior/high school)

Definition of adolescent: *Girls who have menstrual experience aged 10- 19 years*

Interviewer criteria: *Only female FRAs are going to ask this section*

1.4 Do the school have available *MHM experienced*, adolescent girl?.....

No..... 0  
Yes..... 1

**Skip Note-1.1:** *If answer of 1.4 is 0, then finish the interview*

1.4.a If answer of 1.4 is 1 then mention the class (Use code 2 to 9).....

1.5 Do you have any problem if I ask you to share us regarding your menstrual hygiene practices?.....

No..... 0  
Yes..... 1

**Skip Note-1.2:** *If answer of 1.5 is 1, then finish the interview*

1.6 How old are you? Year:   Month:

1.6a How old were you when you started menstruating, insert 999 if cannot remember?

Year:    Month:

1.6b Where were you when your first menstruation occurred?.....

At home ..... 1  
At schools..... 2

1.6c What was your first reaction when you experienced your first menstruation?.....

- Cried..... 1
- Scared ..... 2
- Embarrassed ..... 3
- Happy ..... 4
- Told mum, sister, grandmother, friend, teacher)..... 5
- Did not tell anyone..... 6
- Annoyed..... 7
- Others: Specify..... 777

1.6d Did you know about menstruation before you started menstruating?.....

- No..... 0
- Yes..... 1

1.6e Where did you get the information about menstruation? (Multiple answers allowed here?).....

- No..... 0
- Yes..... 1

- 1. Mother.....
- 2. Father .....
- 3. Grandmother.....
- 4. Friend .....
- 5. Aunty .....
- 6. Teachers.....
- 7. Sister/ Sister-in law .....
- 8. Doctor/Nurse .....
- 9. TV/Radio .....
- 10. Reading.....
- 777. Other (Specify): .....

1.7 Mainly what do you use during menstruation?.....

- Old Cloth (rag)..... 1
- New cloth..... 2
- Pad..... 3
- Cotton..... 4
- Tissue paper..... 5
- Jhute of garments..... 6
- Nothing..... 7
- Refused to say ..... 666
- Other: Specify: ..... 777

**Skip Note-1.3: If answer of 1.7 is not 1/2, skip to 1.14**

1.8 Generally how many times the cloth used for menstruation you usually change per day? (666=refused to say)

Times:.....

1.9 How do you clean/ wash this cloth (rag)?.....

- With soap..... 1
- With soap & hot water..... 2
- With savlon/ detol..... 3
- With savlon/ detol & hot water..... 4
- With soap, savlon/ detol & water..... 5
- With soap, savlon/ detol & hot water..... 6
- With hot water..... 7
- With only water..... 8
- Don't clean..... 9
- Other (Specify)..... 777

**Skip Note-1.4: If answer of 1.9 is 9 skip to 1.14**

1.10 Where do you clean/ wash this cloth?.....

- In toilet..... 1
- In bathroom..... 2
- Public tap..... 3
- Under tube well..... 4
- Beside pond..... 5
- Beside river..... 6
- Other (Specify)..... 777
- DK..... 999

1.11 Where do you get the water for washing/ cleaning this cloth (rag)? .....

- Shallow tube well(<250 feet)..... 01
- Deep tube well(250+ feet)..... 02
- Protected ring/dug well..... 03
- Unprotected dug well..... 04
- Shallow Tara pump..... 05
- Deep Tara pump..... 06
- Piped water into dwelling..... 07
- Piped water into yard/plot..... 08
- Public tap/stand pipe..... 09
- Arsenic filter ..... 10
- Arsenic free treatment plant..... 11
- Water from protected spring..... 12
- Water from unprotected spring..... 13
- Rainwater..... 14

|                                                                             |     |
|-----------------------------------------------------------------------------|-----|
| Tanker truck.....                                                           | 15  |
| Cart with small tank.....                                                   | 16  |
| Pathogen treatment plant (Pond Sand Filter):                                |     |
| River/dam/lake/ponds/stream/canal/irrigation channel.17                     |     |
| Directly from River/dam/lake/ponds/<br>stream/canal/irrigation channel..... | 18  |
| Distilled bottled water.....                                                | 19  |
| Boiled water.....                                                           | 20  |
| Other: specify.....                                                         | 777 |
| DK.....                                                                     | 999 |
| Not applicable.....                                                         | 888 |

1.12 For repeated use of menstrual cloth, where do you dry the menstrual cloth?

|   |                                                                                            |
|---|--------------------------------------------------------------------------------------------|
| A | In dry season <input type="checkbox"/> <input type="checkbox"/> <input type="checkbox"/>   |
| B | In winter <input type="checkbox"/> <input type="checkbox"/> <input type="checkbox"/>       |
| C | In rainy season <input type="checkbox"/> <input type="checkbox"/> <input type="checkbox"/> |

|                                             |     |
|---------------------------------------------|-----|
| Inside the house but hiding somewhere.....  | 1   |
| Inside the house but open place.....        | 2   |
| Outside the house and in sunlight.....      | 3   |
| Outside the house but hiding somewhere..... | 4   |
| In side kitchen over cocking stove.....     | 5   |
| Inside the toilet.....                      | 6   |
| Inside the bathroom.....                    | 7   |
| Other: specify.....                         | 777 |
| DK.....                                     | 999 |
| NA.....                                     | 888 |

1.13 Where do you preserve this cloth for next use?.....

|                                  |     |
|----------------------------------|-----|
| Normally like other clothes..... | 1   |
| At a hidden place.....           | 2   |
| Under bed.....                   | 3   |
| Inside the latrine.....          | 4   |
| Other: specify.....              | 777 |

1.14 Do you have separate room/place in your school to change their disposable pad/cloth during menstruation? .....

|          |   |
|----------|---|
| No.....  | 0 |
| Yes..... | 1 |

**Skip Note-1.5: If answer of 1.14 is 0 skip to 1.17**

1.15 Is it safe to use?.....

|          |   |
|----------|---|
| No.....  | 0 |
| Yes..... | 1 |

1.15a Is it private to use?.....

|          |   |
|----------|---|
| No.....  | 0 |
| Yes..... | 1 |

1.15b Is it clean to use?.....

No..... 0  
Yes..... 1

1.16 Do you use it? .....

No..... 0  
Yes..... 1

1.17 Are there sanitary pad disposal bins in the girl's latrine/ changing room? .....

No..... 0  
Yes..... 1

1.18 Is there soap in the girls' latrine/ changing room? .....

No..... 0  
Yes..... 1

1.19 Do you have any hygiene kit (Detol, rag/cotton, soap) in your school for using during menstruation? .....

No..... 0  
Yes..... 1

1.20 Do you have enough water supply or storage in your school for using during menstruation? .....

No..... 0  
Yes..... 1

1.21 Do you have to go inside the latrine for menstrual cleaning in your school during menstruation?.....

No..... 0  
Yes..... 1  
Not applicable.....888

1.22 Are there place to dispose the used cloth/pad for menstrual hygiene?.....

No .....0  
Yes .....1  
DK.....999  
Not applicable.....888

1.23 What do you do if there is no place to dispose the used cloth/pad for menstrual hygiene?.....

Openly disposed..... 1  
Disposed inside toilet pan..... 2  
Hiding inside classroom..... 3  
Do not change staying at school..... 4  
Other: specify..... 777

1.24 If the answer of 1.7 is 3 (pad) then, how much do you pay a month for using your disposable/commercial pads? (Code: 888=Not applicable) Taka.....

1.25 Do you come to school during menstruation?.....

No..... 0  
Yes..... 1

**Skip Note-1.6 : If answer of 1.25 is 1 skip to 1.27**

1.26 If not, why? (Multiple answers allowed here)

No..... 0  
Yes..... 1

- 1. No place to change the rag/clothes.....
- 2. No water available.....
- 3. No soap/liquid soap.....
- 4. I do not feel comfortable.....
- 5. I remain sick.....
- 6. Over bleeding.....
- 777. Other (specify).....

1.27 Do you feel comfortable at school during menstruation? .....

No.....0  
Yes.....1  
Not applicable..... 888

1.28 Do you feel uncomfortable sitting next to male students during menses? .....

No..... 0  
Yes..... 1  
Not applicable..... 888

1.29 Do male students tease you during menses?.....

No.....0  
Yes.....1  
Not applicable.....888

1.30 Do you think menstrual problems interfere with school performance? .....

No..... 0  
Yes..... 1

**Skip Note-1.7: If answer of 1.30 is 0 skip to 1.32**

1.31 If yes, how? .....

Low concentration ..... 1  
Missing lessons ..... 2  
Other: specify..... 777

1.32. Do you know of any girl who dropped out of schools because of menstruation?.....

No..... 0  
Yes..... 1

1.33 Did you miss any class during menstruation in the last three months?.....

No..... 0  
Yes..... 1

**Skip Note-1.8: If answer of 1.33 is 0 skip to 1.35**

1.34 If yes, how often (average of last three months in school days)?.....

One day every cycle ..... 1  
Two days every cycle ..... 2  
Three days every cycle ..... 3  
Four days every cycle ..... 4  
Five days every cycle ..... 5  
Six days every cycle.....6  
Seven days every cycle.....7

1.35 Do you think that the school facilities are appropriate for managing menstrual hygiene?.....

No..... 0  
Yes..... 1  
Can manage somewhat..... 2

1.36 If school facilities are not appropriate what are the reasons or difficulties? (Multiple answers allowed here)

No.....0  
Yes.....1

- 1. No secret room/change room for girl.....
- 2. No hygiene kit/soap separate for girl children .....
- 3. No water facilities for girl children.....
- 4. Wash room is common for all .....
- 5. We need to go inside the latrine for menstrual cleaning .....
- 6. No private disposal/incineration facilities for disposable napkins.....
- 777. Other (specify).....

1.37 What the activities are forbidden for you during the menstruation period? (Multiple answers allowed here)

No..... 0  
Yes..... 1

a. Not go to certain places.....

- b. Not touch certain things (i.e don't get up bed) .....
- c. Not eat certain foods.....
- d. Not allowed to cook.....
- e. Not allowed to go out.....
- f. Not allowed to religious activities.....
- g. Nothing.....
- h. Others specify.....

**Section 2: Knowledge level Questions:**

2.1 What is your knowledge on ministration?.....

  

- A normal phenomenon of reproductive health of a female..... 1
- A Illness of a female..... 2
- Curse of God..... 3
- No idea/No experience..... 4
- DK..... 999

2.2 Do you think menstruation is a female and/or personal matter, to be kept to oneself only, not to talk about it  
openly?.....

- No..... 0
- Yes..... 1

2.3 What facilities and programmes are there in the school for promoting safe and private menstrual hygiene for older girls?  
(Multiple answers allowed here)

- No..... 0
- Yes..... 1

- 1. Separate girls latrine.....
- 2. Separate girls urination facilities.....
- 3. Separate change room.....
- 4. Soap available at change room.....
- 5. Water available at change room.....
- 6. Girls counseling facilities are available for menstrual hygiene management.



- 7. Nothing.....
- 999. DK.....
- 777. Others (specify).....
- 888. Not applicable.....

2.4 What menstrual hygiene education sessions are provided for girls? (Multiple answers allowed here)

No..... 0  
 Yes..... 1

- 1. Counseling for girls.....
- 2. Separate class are arranged for girls.....
- 3. Menstrual hygiene management education are there in the school curriculum
- 4. NGO/health workers arrange sessions for girls.....
- 5. Nothing.....
- 777. Others (specify).....
- 888. Not applicable.....

2.5 Did you receive information regarding menstrual hygiene management in school before the onset of menstruation?

.....

No .....0  
 Yes .....1  
 DK..... 999

2.6 Do you know about the implications of inadequate management of menstrual hygiene?.....

No..... 0  
 Yes..... 1  
 DK..... 999

2.7 What are the implications of inadequate management of menstrual hygiene? (Multiple answers allowed here) ...

No..... 0  
 Yes..... 1

- 1. Pain during urination.. .....

- 2. Pains at lower abdomen...
- 3. Anaemia.....
- 4. Tired/feel sleepy.....
- 5. Hampers the regular works.....
- 6. Itching.....
- 7. White/gray vaginal discharge.....
- 8. Mild back pain.....
- 9. Bleeding between menstrual period.....
- 10. Appetite loss.....
- 11. Fever.....
- 12. Headache and fatigue.....
- 777. Others(specify).....
- 999. DK.....

2.8 Is there any kind of napkin distribution programme at your school?.....

  

- No ..... 0
- Yes ..... 1
- DK.....999

2.9 In the last 6 months, have you experienced any of the following symptoms? (multiple answers allowed here)

- No..... 0
- Yes..... 1

- 1. Itching.....
- 2. Irritation/soreness of the vagina.....
- 3. Redness and swelling.....
- 4. Lumps and blister.....

- 5. Smelling discharge.....
- 6. Unusual discharge.....
- 7. Nothing happened .....
- 666. Refused to say.....
- 777. Other (Specify:.....

**Skip Note-1.9: If answer of 2.9 is 7/666, then skip to section-3**

2.10 If the answer of 2.9 is 1-6, whom do you talk to? .....

- Mother..... 1
- Father..... 2
- Grandmother..... 3
- Friend..... 4
- Auntie..... 5
- Teachers..... 6
- Sister/ Sister in-law..... 7
- Doctor/nurse..... 8
- TV/Radio ..... 9
- Nobody..... 10
- Other (Specify)..... 777

2.11 Where did you get the treatment? .....

- Local/Village clinics..... 1
- Private Clinic..... 2
- MBBS Doctor..... 3
- Pharmacy..... 4
- Traditional healer..... 5
- Self-treatment at home..... 6
- No action taken..... 7
- Other (Specify):..... 777

**Part 2: SPOT CHECK**

**Section 3: Water supply:**

3.1 Whether there exists platform? (Observe).....

- No..... 0
- Yes..... 1
- Not applicable..... 888

3.2 Is the platform broken? (Observe).....

- No.....0
- Yes i.e. broken..... 1
- Not applicable.....888

3.3 Is there water logging in the platform? (Spot check).....

No.....0  
 Yes.....1  
 Not applicable....888

3.4 Did the area surrounding the water source look clean? [Considering presence of cow dung, solid waste etc(Observe only)].....

No..... 0  
 Yes..... 1  
 Not applicable..... 888

**Sanitation:**

3.5 Who uses the latrine(s)? (Ask and spot check).....

Only Girl’s latrine..... 1  
 Girls and female teacher’s latrine..... 2  
 Only Boy’s latrine..... 3  
 Boys and male teacher’s latrine..... 4  
 Only Teacher’s latrine..... 5  
 Non specific/for all..... 6  
 For all students..... 7  
 Nothing written on the door..... 8  
 Other (Specify)..... 777  
 Not applicable..... 888

3.6. Mention the type of toilet facilities (Observe only)

**Toilet code list**

Piped sewer system..... 01  
 Septic tank..... 02  
 Flush to pit latrine..... 03  
 Pit latrine with slab & water seal..... 04  
 Pit latrine with slab & no water seal but with a lid.....05  
 Pit latrine with slab & flap, no water seal ..... 06  
 Ventilated Improved Pit (VIP) latrine..... 07  
 Composting toilet, (*Composting toilet ensure separation of urine, water and excreta*)..... 08  
 Flush or pour flush toilet connected to somewhere else  
 (canal, ditch, river, etc..... 09  
 Pit latrine without slab/open pit..... 10  
 Pit latrine with slab & no water seal/broken water seal and no lid..... 11  
 Hanging toilet/latrine]..... 12  
**Open defecation:**  
 No facility/bush/field..... 13  
 Others: Specify..... 777  
 Not Applicable..... 888

3.7. Is there a door on the latrine?(Observe only).....

No..... 0

Yes..... 1  
 Not applicable..... 888

3.8. Is the door of the latrine(s) open?(Observe only).....

No..... 0  
 Yes..... 1  
 Not applicable..... 888

3.9. Is the latrine(s) functional (usable)? (Observe only).....

No..... 0  
 Yes..... 1  
 Not possible to observe..... 2  
 Not applicable..... 888

**Skip note 1.10: If the answer of 3.9 is not 2 then skip to 3.10**

3.10. Why observation was not possible?.....

Locked]..... 1  
 Other: specify ..... 777  
 Not applicable..... 888

3.11. Visit each latrine and If there is visible stool in any of the functional toilet facilities (in the pan) of this school?.....

No..... 0  
 Yes..... 1  
 Not possible to observe..... 2  
 Not applicable..... 888

3.12. Visit each latrine and see if there is stool visible on the slab or floor of the toilet facility?.....

No..... 0  
 Yes..... 1  
 Not possible to observe..... 2  
 Not applicable..... 888

3.13. Visit each latrine and see if there is any fecal smell in the toilet facility? (Observe only).....

No..... 0  
 Yes..... 1  
 Not possible to observe..... 2  
 Not applicable..... 888

3.14. Provision of hand cleaning agent in or near latrine(<30feet).....

Soap..... 1  
 Detergent..... 2  
 Ash..... 3  
 Mud..... 4  
 Nothing..... 5  
 Other: specify ..... 777  
 N/A..... 888

3.15. Are there any anal cleansing materials available in the functional student's toilet facilities? (Observe only).....

- Water..... 1
- Toilet paper..... 2
- Cloth..... 3
- Piece of mud..... 4
- Nothing..... 5
- Water & Toilet paper..... 6
- Water & Cloth..... 7
- Water & Piece of mud..... 8
- Other (Specify)..... 777
- N/A..... 888
- Not possible to observe..... 999

**Hand washing**

3.16. What are the devices for hand washing? (Observe only).....

- Specially designed hand washing system (A drum with a tap)]..... 1
- Basin ..... 2
- Water container (e.g. bucket, mug). ..... 3
- There is not any device ..... 4
- Other: (specify)..... 777
- N/A..... 888

**Skip note 1.11:** [If 3.16 is 4 then skip to question no 3.19]

3.17 If are they functional handwashing device then how many?..

3.18 Observation only: Is there water available for hand washing in the Hand washing device?.....

- No..... 0
- Yes..... 1
- Not applicable..... 888

3.19. Where is the soap for hand washing usually located? (Ask to show the location of the soap, and fill out response according to observation).....

- Next to hand washing device (<30 feet)..... 1
- Next to or outside the toilet..... 2
- Away from hand washing device(>30 feet)..... 3
- In the teacher's room/office room..... 4
- In the classroom..... 5
- Inside the toilet..... 6
- None..... 7
- Other: (specify)..... 777
- N/A..... 888

3.20. Observation only: Soap or detergent brought by the interviewee within 30 feet's?

- No..... 0
- Yes..... 1
- Not applicable..... 888

- a. Soap.....
- b. Detergent.....
- c. Other: specify.....

**Solid Waste disposal**

3.21. How do the school children dispose solid waste there?[Observe only].....

- Completely/rightly (no waste outside) ..... 1
- Partially (Wastes are disposed partly inside and partly outside) ..... 2
- Do not (no garbage inside and no symptoms of waste disposal on the way or inside)..... 3
- Non specific place..... 4

**Environmental Cleanliness**

3.22. Whether class rooms are clean (Considering the presence of waste paper, soot, food, dust, leaves). .....

- Waste is not visible/clean..... 1
- Some waste is visible..... 2
- Not clean..... 3

3.23. Whether school compound is clean (Considering presence of cow dung, solid waste and human feces).....

- Clean (waste is not visible)..... 1
- Not quite clean (some waste is visible)..... 2
- Not clean (waste is seen here and there)..... 3

3.24. End time (Hour: Minute).....  :

**Question for FRA:**

3.25. Have you checked the questionnaire once you have completed it?.....

- No..... 0
- Yes..... 1

*Thank you.*
